# Supplementary material
Source: PubMed Central journal article supplement (PMC3357125)
Supplement: NIHMS375944-supplement-1_si_001.pdf [file NIHMS375944-supplement-1_si_001.pdf]

## **Supporting Information**

### **Ligand-dependent Exponential Amplification of a Self-replicating L-RNA Enzyme**

*Charles Olea, Jr., David P. Horning, and Gerald F. Joyce*

Departments of Chemistry and Molecular Biology and The Skaggs Institute for Chemical Biology

The Scripps Research Institute, 10550 North Torrey Pines Road, La Jolla, California 92037

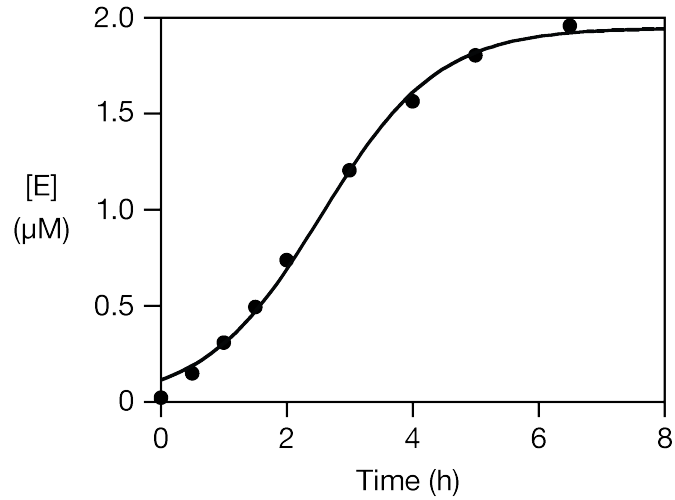

**Figure S1.** Exponential amplification of self-replicating D-RNA enzymes, employing materials prepared by *in vitro* transcription. The data were fit to the logistic growth equation (see Materials and Methods). The exponential growth rate was  $1.1 \text{ h}^{-1}$  and the maximum extent was  $1.9 \text{ μM}$ . Reaction conditions:  $2.5 \text{ μM A}$ ,  $20 \text{ μM B}$ ,  $0.25 \text{ μM E}$ ,  $25 \text{ mM MgCl}_2$ , pH 8.5,  $42 \text{ °C}$ .

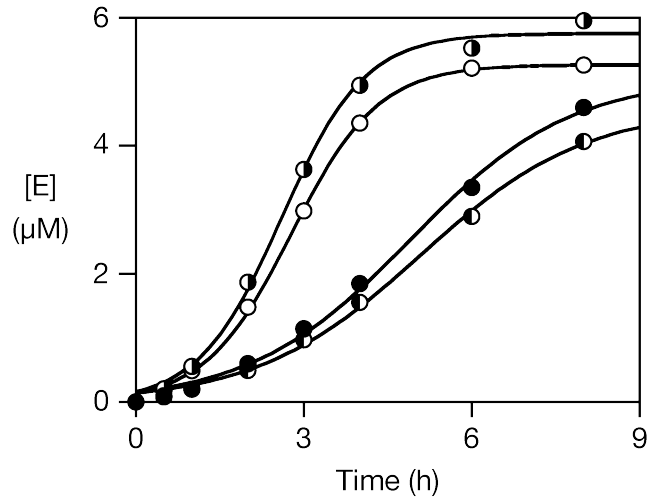

**Figure S2.** Exponential amplification of self-replicating D-RNA enzymes, employing substrates prepared by either solid-phase synthesis (filled circles) or *in vitro* transcription (open circles). The left and right half of the circles (filled or open) correspond to the A and B substrates, respectively. The data were fit to the logistic growth equation (see Materials and Methods). Reaction conditions: 10  $\mu\text{M}$  A, 10  $\mu\text{M}$  B, no starting E, 25 mM  $\text{MgCl}_2$ , pH 8.5, 42  $^\circ\text{C}$ .

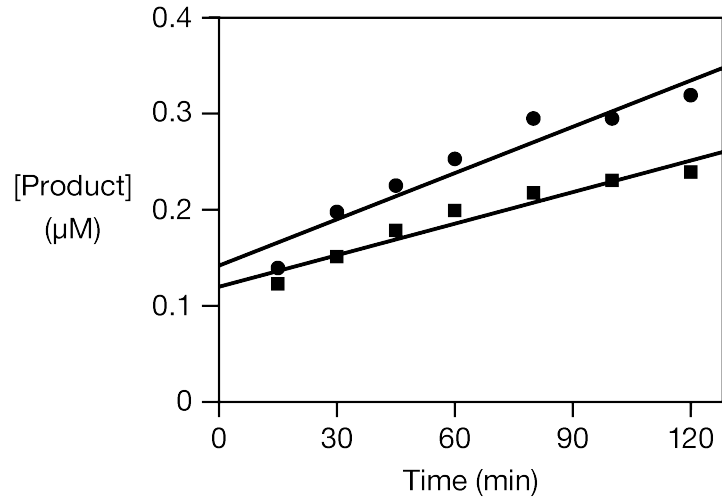

**Figure S3.** Catalytic activity of the D- and L-RNA enzymes, measured in a simple ligation reaction employing an oligonucleotide substrate having the sequence 5'-GGUCUCAUAU-3' in place of substrate A. This oligonucleotide is complementary to a portion of E that binds A during self-replication. The reaction is biphasic, with a rapid initial burst followed by a slower linear phase.<sup>1</sup> The data were obtained during the latter phase and fit to a linear equation, giving observed rates for the D- (squares) and L- (circles) RNA-catalyzed reactions of 0.26 and 0.39 h<sup>-1</sup>, respectively. Reaction conditions: 2.5 µM oligonucleotide, 20 µM B, 0.25 µM E, 25 mM MgCl<sub>2</sub>, pH 8.5, 42 °C.

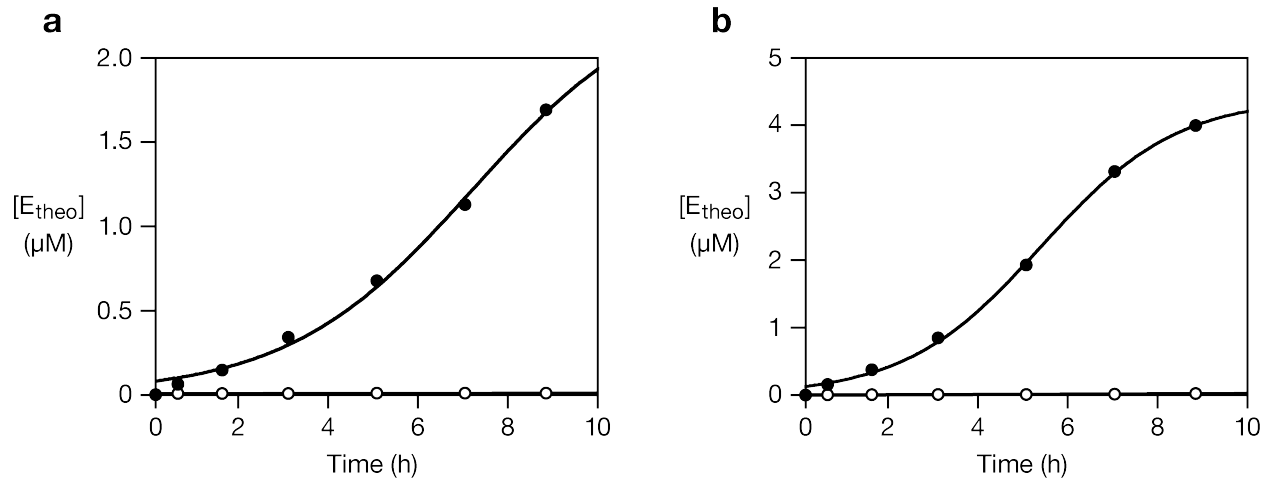

**Figure S4.** Ligand-dependent exponential amplification of self-replicating RNA enzymes, employing either (a) synthetic D- $A_{\text{theo}}$  and D-B, or (b) synthetic L- $A_{\text{theo}}$  and L-B. The reactions were carried out in either the presence (filled circles) or absence (open circles) of 5 mM theophylline. The data were fit to the logistic growth equation (see Materials and Methods). Reaction conditions: 10  $\mu\text{M}$   $A_{\text{theo}}$ , 10  $\mu\text{M}$  B, no starting E,  $\pm$  5 mM theophylline, 25 mM  $\text{MgCl}_2$ , pH 8.5, 42  $^\circ\text{C}$ .

## Materials and Methods

**Materials.** Oligonucleotides were prepared by solid-phase synthesis using an Expedite 8909 DNA/RNA synthesizer, with all reagents and nucleoside phosphoramidites purchased from Glen Research (Sterling, VA) except L-2'-*t*-butyldimethylsilyl RNA phosphoramidites, which were from ChemGenes (Wilmington, MA). All oligonucleotides were purified by denaturing polyacrylamide gel electrophoresis (PAGE) and subsequent ethanol precipitation. Histidine-tagged T7 RNA polymerase and M1 RNA were prepared as described previously.<sup>2,3</sup> T4 polynucleotide kinase and Antarctic phosphatase were purchased from New England Biolabs (Ipswich, MA), bovine pancreatic DNase I was from Roche Applied Science (Indianapolis, IN), and Superscript II reverse transcriptase was from Life Technologies (Carlsbad, CA). Yeast inorganic pyrophosphate, nucleoside and deoxynucleoside 5'-triphosphates, and theophylline were from Sigma-Aldrich (St. Louis, MO), [ $\gamma$ -<sup>32</sup>P]ATP (6  $\mu$ Ci/pmol) was from Perkin-Elmer (Waltham, MA), and human serum (off-clot) was from MP Biomedicals (Solon, OH).

**Preparation of enzyme and substrates by *in vitro* transcription.** Transcribed forms of the D-RNA enzyme (E) and substrates (A and B) were prepared as described previously.<sup>2,3</sup> E was obtained by run-off transcription of a corresponding DNA template. A was generated from transcribed E using *E. coli* M1 RNA and an external guide RNA to give cleaved products of uniform length, ending in a 3'-hydroxyl.<sup>2,4</sup> B was transcribed with a self-cleaving hammerhead ribozyme at the 3'-terminus, which resulted in cleaved products of uniform length, ending in a 2',3'-cyclic phosphate.<sup>2</sup> All transcribed materials were purified by PAGE and subsequent ethanol

precipitation. Following purification, A was [5'-<sup>32</sup>P]-labeled by first dephosphorylating using Antarctic phosphatase then phosphorylating using T4 polynucleotide kinase and [ $\gamma$ -<sup>32</sup>P]ATP.

The double-stranded DNA templates used to prepare E and B were obtained by cross-extension of two overlapping synthetic oligodeoxynucleotides, employing reverse transcriptase as a DNA-dependent DNA polymerase. For E the two oligodeoxynucleotides had the sequences 5'-GGCTAATACGACTCACTATAGGAAGTTGTGCTCGATTGTTACGTAAGTAAC-3' and 5'-TAAGTTGCGGTCTCATACTTCAACCCATTCAAAGTGTACTTACGTAACAATC-3'; for B the sequences were 5'-GGCTAATACGACTCACTATTGAGACCGCAACTTATACGGAAAC-3' and 5'-CAACTTTTCGGCCTTTCGGCCTCATCAGTACGTTTCCGTATAAGT-3' (T7 RNA polymerase promoter sequence underlined).

**Preparation of enzyme and substrates by solid-phase synthesis.** Substrates A, A<sub>theo</sub>, and B were synthesized in both the D- and L-form. The enzymes E and E<sub>theo</sub> were generated from the corresponding substrates by RNA-catalyzed self-ligation. D-A and D-A<sub>theo</sub> were 5'-labeled with hexachlorofluorescein, and L-A and L-A<sub>theo</sub> were 5'-labeled with fluorescein, incorporating the corresponding phosphoramidite (Glen Research) as the final coupling step.

The D- and L-B substrates were chemically triphosphorylated prior to their deprotection and cleavage from the solid support<sup>5,6</sup> (Horning & Joyce, unpublished data). Following oligonucleotide synthesis, the 5'-terminal dimethoxytrityl group was removed and the free 5'-hydroxyl was phosphitylated with salicyl phosphorochloridite. This was reacted with tributylammonium pyrophosphate to form the cyclic metaphosphite, then oxidized with iodine to generate the linear 5'-triphosphate. The 5'-triphosphorylated products were verified by MALDI-TOF mass

spectrometry, with a calculated  $MH^+$  of 4,694 Da and measured values of 4,694 and 4,695 Da for D- and L-B, respectively.

**Exponential amplification.** All self-replication reactions were carried out in the presence of 25 mM  $MgCl_2$  and 50 mM EPPS (pH 8.5) at 42 °C. The reactions were initiated by adding a buffered solution of  $MgCl_2$  to a mixture of all of the RNA components, and the reactions were quenched by adding 25 mM  $Na_2EDTA$ . Aliquots were removed from the reaction mixture at various times and analyzed by PAGE, measuring the fraction of either [ $^{32}P$ ]-labeled or fluorescently-labeled A that had been converted to labeled E. These data were fit to the logistic growth equation:  $[E] = a / (1 + be^{-ct})$ , where  $a$  is the final extent,  $b$  is the degree of sigmoidicity, and  $c$  is the exponential growth rate.

## References

- (1) Paul, N.; Joyce, G. F. *Proc. Natl. Acad. Sci. USA* 2002, *99*, 12733–12740.
- (2) Lincoln, T. A.; Joyce, G. F. *Science* 2009, *323*, 1229–1232.
- (3) Lam, B. J.; Joyce, G. F. *J. Am. Chem. Soc.* 2011, *133*, 3191–3197.
- (4) Forster, A. C.; Altman, S. *Science* 1990, *249*, 783–786.
- (5) Lebedev, A. V.; Koukhareva, I. I.; Beck, T.; Vaghefi, M. M. *Nucleosides Nucleotides Nucleic Acids* 2001, *20*, 1403–1409.
- (6) Paul, N.; Springsteen, G.; Joyce, G. F. *Chem. Biol.* 2006, *13*, 329–338.
